# Supplementary material for: Validity of a stroke severity index for administrative claims data research: a retrospective cohort study
Source: PubMed Central journal article supplement (PMC5034530; doi:10.1186/s12913-016-1769-8), 2016-09-22
Supplement: 12913_2016_1769_MOESM1_ESM.pdf [file 12913_2016_1769_MOESM1_ESM.pdf]

### Additional file 1

Table S1. Predictors of the stroke severity index and their corresponding billing codes in Taiwan's National Health Insurance fee schedule.

| Feature                                     | Billing codes                                                                                                                                                                                                                                                                                                                                                                                                                                                                                                                                                                                                                                  |
|---------------------------------------------|------------------------------------------------------------------------------------------------------------------------------------------------------------------------------------------------------------------------------------------------------------------------------------------------------------------------------------------------------------------------------------------------------------------------------------------------------------------------------------------------------------------------------------------------------------------------------------------------------------------------------------------------|
| Airway suctioning                           | 47041C, 47042C                                                                                                                                                                                                                                                                                                                                                                                                                                                                                                                                                                                                                                 |
| Bacterial sensitivity test                  | 13009B, 13009BB, 13010B, 13010BA, 13011B, 13011BB, 13020B                                                                                                                                                                                                                                                                                                                                                                                                                                                                                                                                                                                      |
| General ward stay                           | 02006K, 02007A, 02008B, 03001K, 03002A, 03003B, 03004B, 03005K, 03006A, 03007B, 03008B, 03026K, 03027A, 03028B, 03029B                                                                                                                                                                                                                                                                                                                                                                                                                                                                                                                         |
| ICU stay                                    | 02011K, 02012A, 02013B, 03010E, 03010K, 03011A, 03011F, 03012B, 03012G, 03013B, 03013H, 03047E, 03048F, 03049G, 03050H                                                                                                                                                                                                                                                                                                                                                                                                                                                                                                                         |
| Nasogastric intubation                      | 47017C, 47018C, 47018CA                                                                                                                                                                                                                                                                                                                                                                                                                                                                                                                                                                                                                        |
| Osmotherapy (mannitol or glycerol infusion) | A009633255, A009633266, A009633277, A009745277, A013354277, A015561255, A015561266, A015561277, A016476238, A016476266, A016476277, A031387238, A033425266, A042601238, B014379277, B020322265, B020322277, N012343266, A023733263, A023733265, A023733266, A023733277, A024986209, A024986265, A024986266, A024986277, A025104266, A025104277, A025355266, A025355277, A026793265, A026793266, A026793277, A028475265, A028475277, A029475265, A029475266, A029475277, A034722277, AC23733263, AC23733266, AC23733277, AC24986265, AC24986266, AC24986277, AC28475277, AC29475265, B006604277, B017082263, B017082277, B017728265, B017728277 |
| Urinary catheterization                     | 47013C, 47014C                                                                                                                                                                                                                                                                                                                                                                                                                                                                                                                                                                                                                                 |

*ICU* intensive care unit.

Table S2. Distribution of the NIHSS score across stroke severity groups stratified by the SSI based on unpublished data from the validation cohorts (n = 6617) of our prior study (Sung S-F, et al. *J Clin Epidemiol.* 2015;68:1292–1300).

|                     | Mild<br>(SSI ≤ 5) | Moderate<br>(SSI > 5 to ≤ 12) | Severe<br>(SSI > 12) |
|---------------------|-------------------|-------------------------------|----------------------|
| NIHSS, mean (SD)    | 3.9 (3.6)         | 9.0 (7.1)                     | 18.4 (9.3)           |
| NIHSS, median (IQR) | 3 (1–5)           | 7 (4–12)                      | 19 (11–26)           |

Based on linear regression analysis, the NIHSS score can be predicted as follows:  $NIHSS = 1.1722 \times SSI - 0.7533$  ( $P < 0.0001$ ).

*IQR* interquartile range, *NIHSS* National Institutes of Health Stroke Scale, *SD* standard deviation, *SSI* stroke severity index.

Table S3. Comparison between patients with and without successful linkage.

|                  | Successful linkage |                |              | <i>P</i> |
|------------------|--------------------|----------------|--------------|----------|
|                  | Total (n = 5586)   | Yes (n = 4778) | No (n = 808) |          |
| Age, mean (SD)   | 67.5 (12.6)        | 67.4 (12.7)    | 68.5 (11.9)  | 0.022    |
| Female, n (%)    | 2241 (40.1)        | 1909 (40.0)    | 332 (41.1)   | 0.630    |
| NIHSS, mean (SD) | 7.4 (8.2)          | 7.3 (8.0)      | 8.4 (9.1)    | < 0.001  |
| NIHSS group      |                    |                |              | 0.075    |
| ≤ 5              | 3308 (59.2)        | 2854 (59.7)    | 454 (56.2)   |          |
| > 5 to ≤ 13      | 1281 (22.9)        | 1092 (22.9)    | 189 (23.4)   |          |
| > 13             | 997 (17.9)         | 832 (17.4)     | 165 (20.4)   |          |

*NIHSS* National Institutes of Health Stroke Scale, *SD* standard deviation.

Table S4. Comparison between patients with and without follow-up mRS.

|                                                    | Available mRS at 3 months |                     |                     | <i>P</i> |
|----------------------------------------------------|---------------------------|---------------------|---------------------|----------|
|                                                    | Total (n = 4778)          | Yes (n = 3630)      | No (n = 1148)       |          |
| Age, mean (SD)                                     | 67.4 (12.7)               | 67.6 (12.7)         | 66.7 (12.7)         | 0.031    |
| Female, n (%)                                      | 1909 (40.0)               | 1474 (40.6)         | 435 (37.9)          | 0.102    |
| NIHSS, mean (SD)                                   | 7.3 (8.0)                 | 7.1 (7.8)           | 7.9 (8.7)           | 0.002    |
| NIHSS group                                        |                           |                     |                     | < 0.001  |
| ≤ 5                                                | 2854 (59.7)               | 2188 (60.3)         | 666 (58.0)          |          |
| > 5 to ≤ 13                                        | 1092 (22.9)               | 863 (23.8)          | 229 (20.0)          |          |
| > 13                                               | 832 (17.4)                | 579 (16.0)          | 253 (22.0)          |          |
| SSI, mean (SD)                                     | 7.0 (5.1)                 | 6.8 (4.8)           | 7.8 (5.8)           | < 0.001  |
| Pearson correlation between NIHSS and SSI (95% CI) | 0.712 (0.697-0.726)       | 0.699 (0.682-0.715) | 0.743 (0.715-0.768) |          |

*CI* confidence interval, *mRS* modified Rankin Scale, *NIHSS* National Institutes of Health Stroke Scale, *SD* standard deviation, *SSI* stroke severity index.
